# Supplementary material for: Neuronal Neuregulin 1 type III directs Schwann cell migration
Source: Oxford University Press journal article supplement (doi:10.1242/dev.068072), 2011-09-30
Supplement: dev068072tables1.pdf [file dev068072tables1.pdf]

**Table S1. Primer and morpholino sequences (5'-3')**

| Morpholino                      | Sequence                  |                         |
|---------------------------------|---------------------------|-------------------------|
| Common <i>nrg1</i>              | GATGCGGATTTGCGGCAATACCTGC |                         |
| <i>nrg1</i> type III specific   | GAACTAGGATTGTACTTACAGGTC  |                         |
| Primer                          | Forward                   | Reverse                 |
| <i>st50</i> mutation            | TGCACCCCTATTGTTTACCTT     | GTGTAATCTCCAGGTTACCGTGA |
| <i>z26</i> mutation             | GAGCTGGAGCGGGTAAATAA      | GGTGTGAAACCAGCCACTTT    |
| <i>nrg1</i> common domain probe | GTCACACCAGGCAACATCAG      | GTGATTGTAGTGGGCGGAGT    |
| <i>nrg1</i> MO RT-PCR           | GACACCACAGCTGGACCTTT      | GTTCCCTGTGAATCCTGGAG    |
| <i>nrg1</i> type III MO RT-PCR  | GACACCACAGCTGGACCTTT      | CTGATGTTGCCTGGTGTGAC    |
| <i>ef1a</i>                     | AGGACATCCGTCGTGGTAAT      | AGAGATCTGACCAGGGTGGTT   |
| Human <i>NRG1</i> type III      | CCGACACCGAAGAATCGTAT      | ACTCCCCTCCATTACACAG     |
